# Supplementary material for: Spontaneous organization and phase separation of skyrmions in chiral active matter
Source: Royal Society of Chemistry journal article supplement (doi:10.1039/d2sm00819j), 2022-01-01
Supplement: d2sm00819j1.pdf [file d2sm00819j1.pdf]

## Electronic Supplementary Information for Spontaneous organization and phase separation of skyrmions in chiral active matter

Zhong-Yi Li <sup>a</sup>, De-Qing Zhang <sup>a</sup>, Shao-Zhen Lin <sup>b</sup>, Wojciech T. Gózdź <sup>c</sup>, and Bo Li <sup>a</sup>

<sup>a</sup> *Institute of Biomechanics and Medical Engineering, Applied Mechanics Laboratory,  
Department of Engineering Mechanics, Tsinghua University, Beijing 100084, China*

<sup>b</sup> *Aix Marseille Université, CNRS, Centre de Physique Théorique, Turing Center for  
Living Systems, 13009 Marseille, France*

<sup>c</sup> *Institute of Physical Chemistry, Polish Academy of Sciences, Kasprzaka 44/52,  
01-224 Warsaw, Poland*

In this Electronic Supplementary Information (ESI), we provide additional results to supplement the main text.

### Additional results

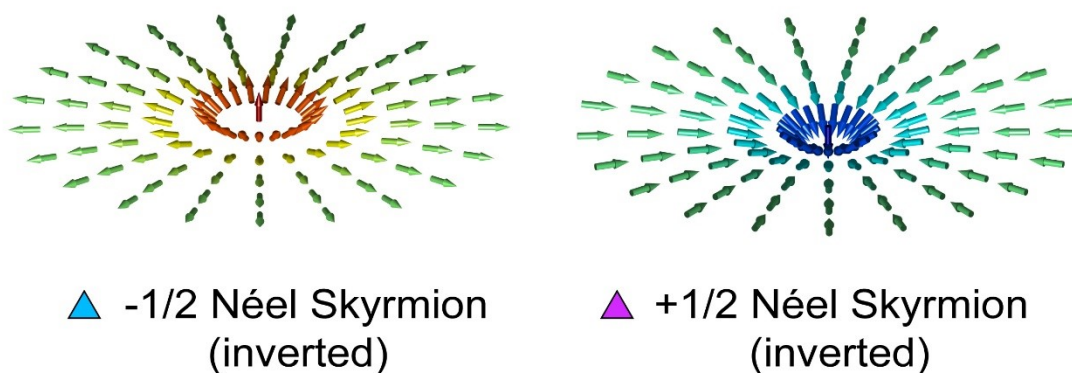

**Fig. S1.** Two other structures of half Néel skyrmions.

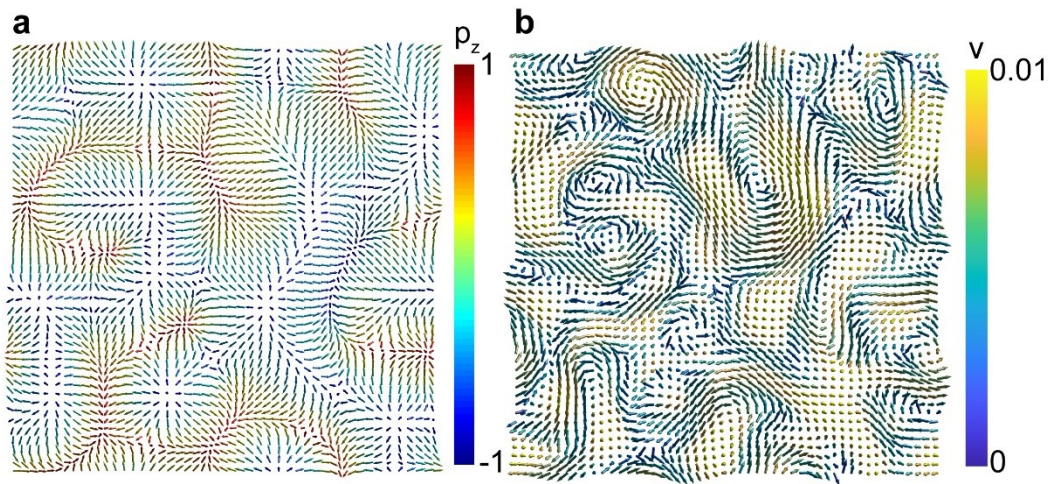

**Fig. S2.** (a) Polarization direction field  $\mathbf{p}$ , which corresponds to isolated skyrmions ( $\alpha=0.02$ ). Arrows represent the direction of polarization. (b) Velocity field  $\mathbf{v}$  corresponding to (a).

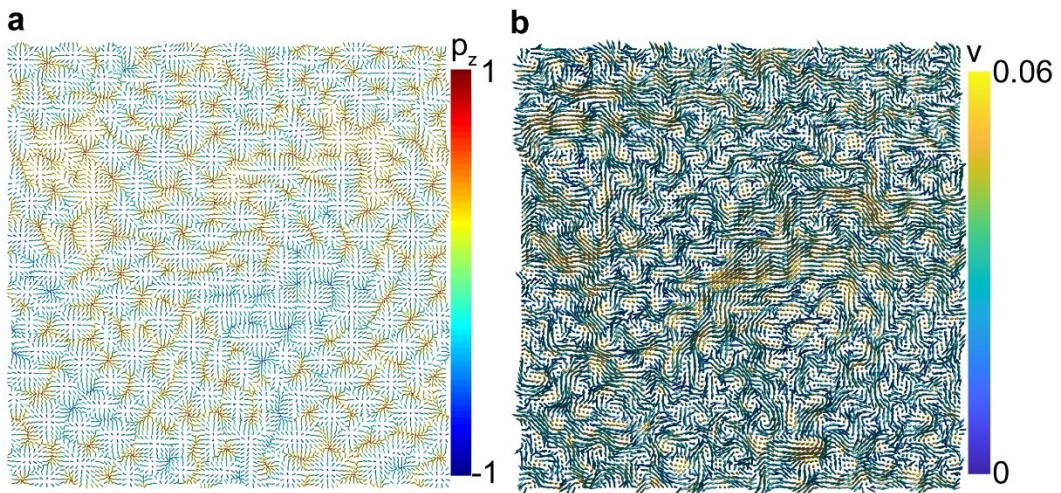

**Fig. S3.** (a) Polarization direction field  $\mathbf{p}$ , which corresponds to crowded skyrmions ( $\alpha=0.26$ ). Arrows represent the direction of polarization. (b) Velocity field  $\mathbf{v}$  corresponding to (a).

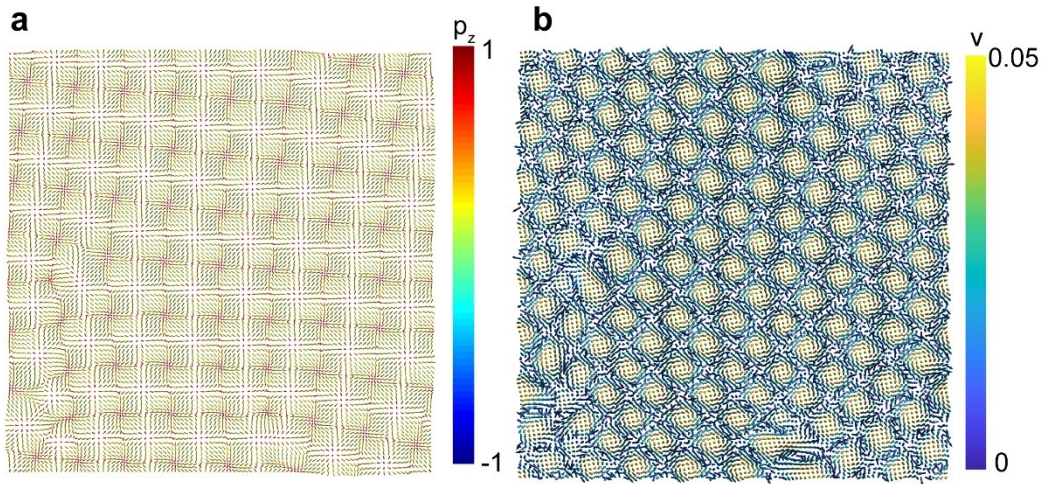

**Fig. S4.** (a) Polarization direction field  $\mathbf{p}$  with the initial conditions for  $\mathbf{p}$  along the  $z$  direction ( $\alpha=0.14$ ). Arrows represent the direction of polarization. (b) Velocity field  $\mathbf{v}$  corresponding to (a).

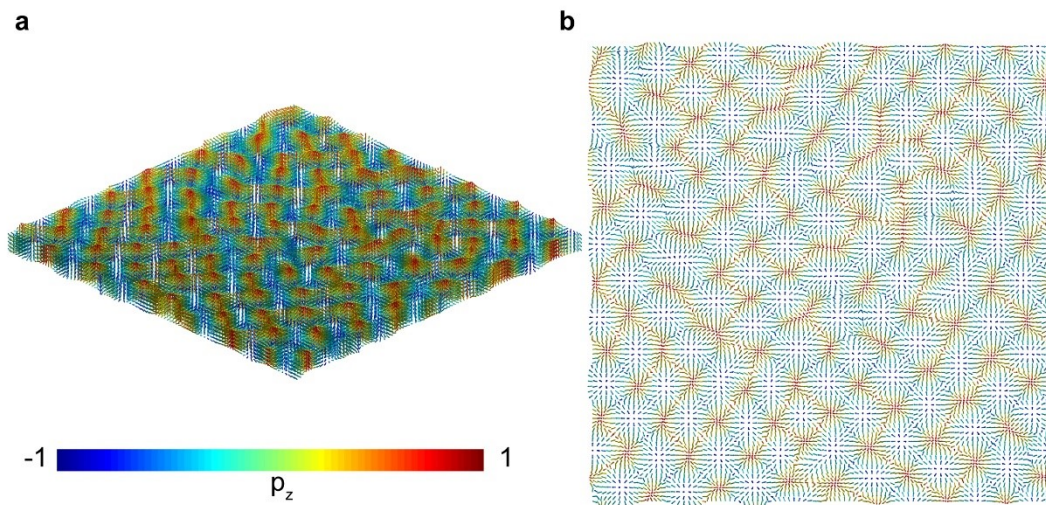

**Fig. S5.** (a) Polarization direction field  $\mathbf{p}$  with  $100 \times 100 \times 5$  grid ( $\alpha=0.14$ ). Arrows represent the direction of polarization. (b) Vertical view corresponding to (a).
